# Supplementary material for: Narrowing down chain length effects on the antibacterial action of guanylated oligomers
Source: Royal Society of Chemistry journal article supplement (doi:10.1039/d3py00203a), 2023-01-01
Supplement: d3py00203a1.pdf [file d3py00203a1.pdf]

## Supporting Information

# Narrowing Down Chain Length Effects on the Antibacterial Action of Guanylated Oligomers

*Dries Wyers,<sup>a</sup> Thanavit Jirapanjawat,<sup>b,c</sup> John F. Quinn,<sup>d,e</sup> Michael R. Whittaker,<sup>d</sup> Chris  
Greening,<sup>b,c</sup> Tanja Junkers<sup>a,\*</sup>*

<sup>a</sup> *Polymer Reaction Design Group, School of Chemistry, Monash University, 19 Rainforest Walk,  
Clayton VIC 3800, Australia*

<sup>b</sup> *Centre to Impact AMR, Monash University, Clayton, VIC 3800, Australia*

<sup>c</sup> *Department of Microbiology, Biomedicine Discovery Institute, Clayton, VIC 3800, Australia*

<sup>d</sup> *Drug Delivery, Disposition and Dynamics Theme, Monash Institute of Pharmaceutical Sciences,  
Monash University, Parkville, Victoria 3052, Australia*

<sup>e</sup> *Department of Chemical Engineering, Faculty of Engineering, Monash University, Clayton,  
Victoria 3800, Australia*

# <sup>1</sup>H and <sup>13</sup>C NMR analysis monomer

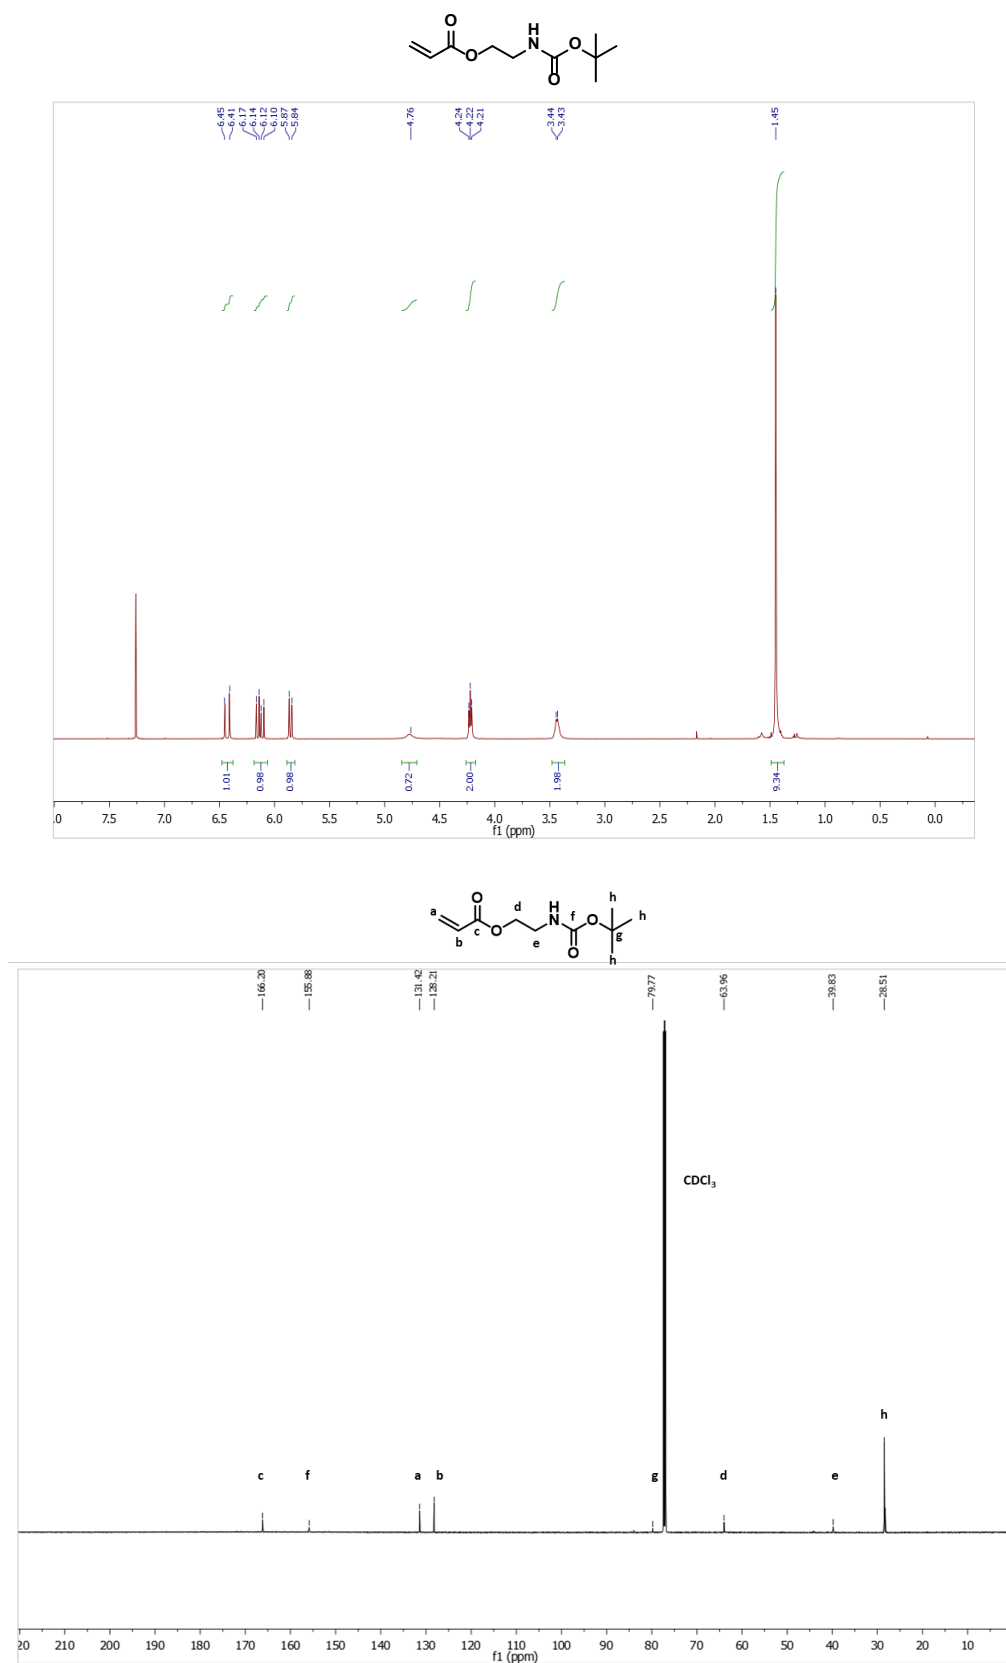

**Figure S1:** <sup>1</sup>H NMR (upper) and <sup>13</sup>C NMR (lower) of 2-Boc aminoethyl acrylate

**<sup>1</sup>H NMR analysis of discrete and disperse oligomers before/after thiol-ene reaction and deprotection**

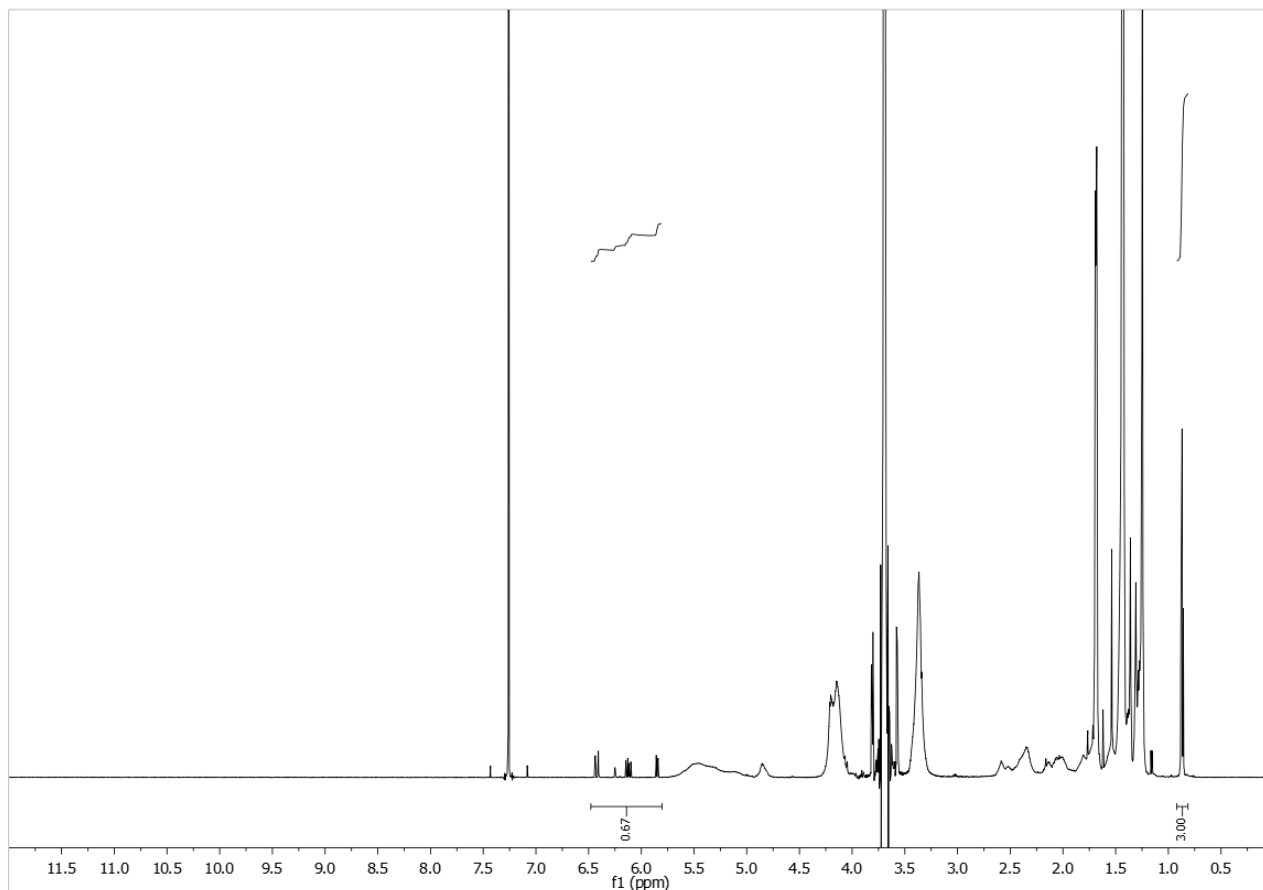

**Figure S2:** Determination of the monomer conversions of homopolymers of the different model monomers via <sup>1</sup>H NMR in CDCl<sub>3</sub>: comparing the average integration of the vinyl peaks (monomer) to the integration of the endgroup as reference integrated for three protons. A reference sample at 0 minutes reaction time (T<sub>0</sub>) was taken to which the vinyl integration were compared. The monomer conversion (p) was calculated using the following formula:

$$p = 1 - \left( \frac{\int I_{\text{vinyl peaks } T_r}}{\int I_{\text{vinyl peaks } T_0}} \right)$$

T<sub>r</sub> represents the reaction time after which a sample was taken.

**Table S1:** Summarizing table of the DP, theoretical and exact masses of monodisperse oligomers isolated through FCC separation and boc deprotection. Exact masses were found on ESI-MS.

| Insert | DP | Theoretical mass<br>( $M + H^+$ ) | Exact mass<br>( $M + H^+$ ) |
|--------|----|-----------------------------------|-----------------------------|
| 1      | 5  | 921.486                           | 921.474                     |
| 2      | 6  | 1036.549                          | 1036.550                    |
| 3      | 7  | 1151.612                          | 1151.613                    |
| 4      | 8  | 1266.676                          | 1266.674                    |

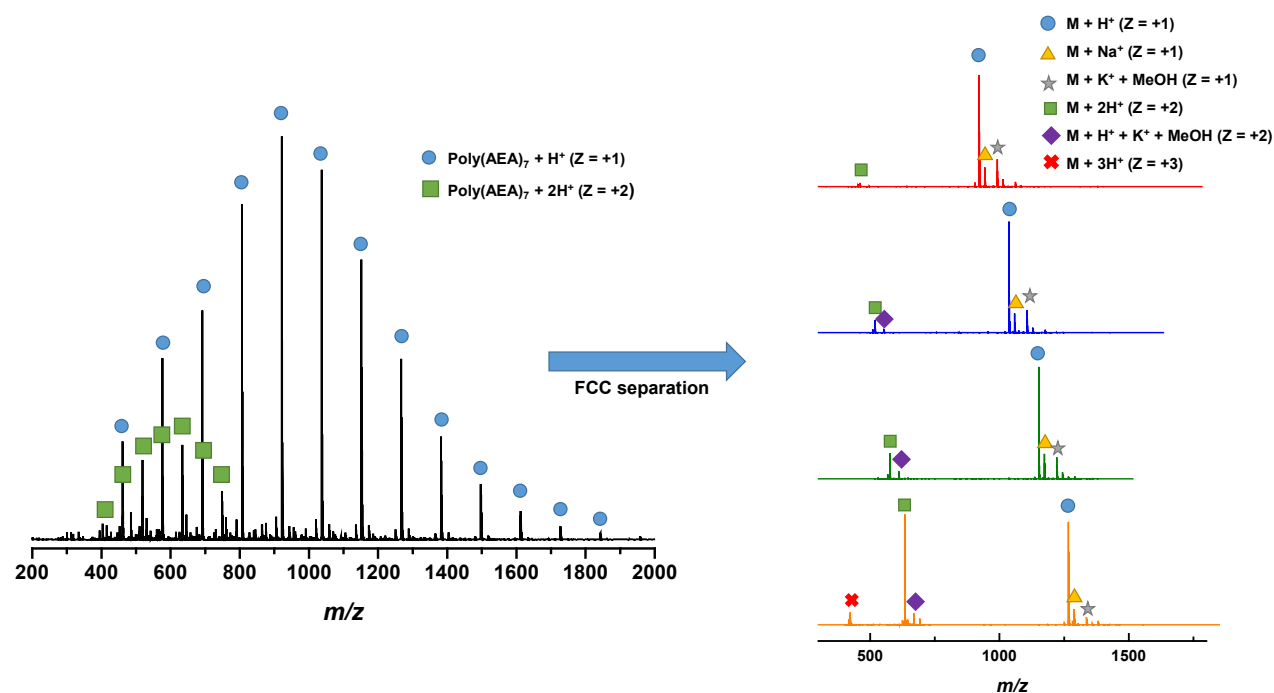

**Figure S3:** ESI-MS spectra of both crude (left) poly(AEA)<sub>7</sub> and isolated monodisperse oligomers (right) with 5 to 8 monomer insertions. Boc protection group removal was required prior to ESI-MS analysis to ensure proper ionization of the compounds.

**Table S2:** Summarizing table of the DP, theoretical and exact masses of monodisperse oligomers after end group modification through aminolysis and *in situ* thiolene coupling and subsequent boc deprotection.

| Insert | DP | Theoretical mass<br>(M + H <sup>+</sup> ) | Exact mass<br>(M + H <sup>+</sup> ) |
|--------|----|-------------------------------------------|-------------------------------------|
| 1      | 5  | 917.5628                                  | 917.5684                            |
| 2      | 6  | 1032.6261                                 | 1032.6351                           |
| 3      | 7  | 1147.6894                                 | 1147.6991                           |
| 4      | 8  | 1262.7528                                 | 1262.7425                           |

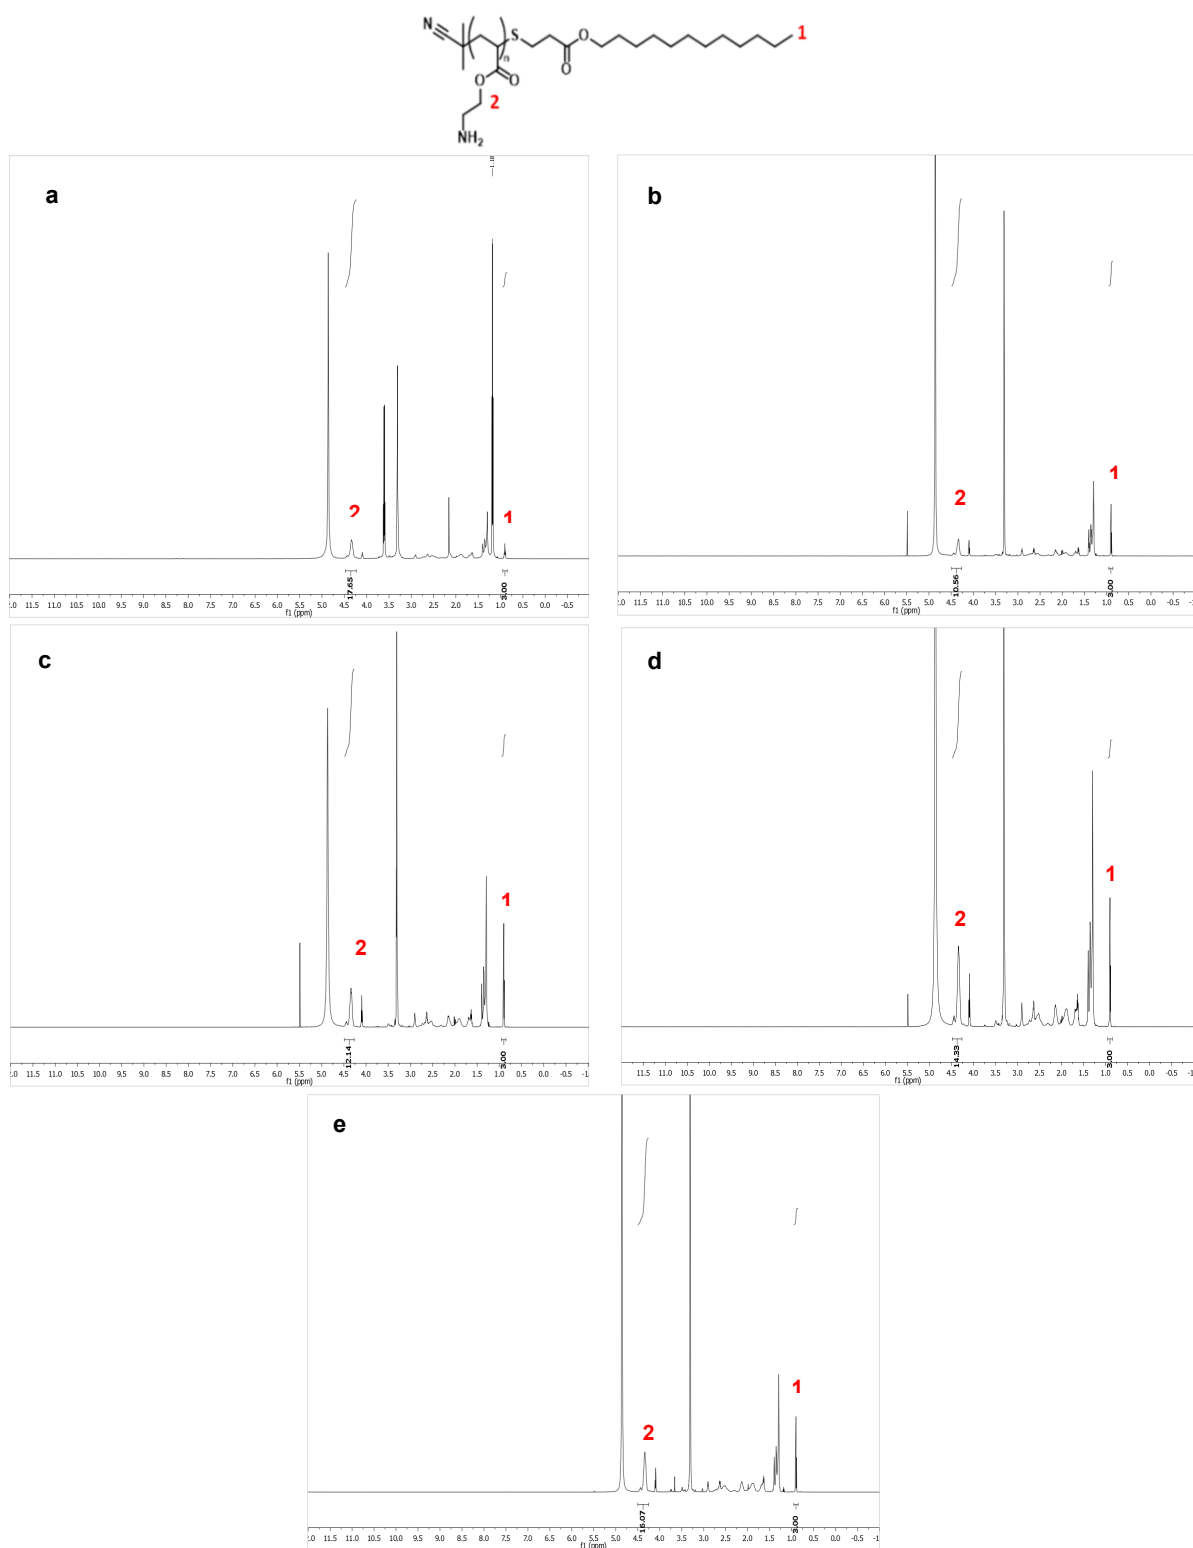

**Figure S4:**  $^1\text{H}$  NMR of disperse (a) and discrete oligomers with 5 (b), 6 (c), 7 (d) or 8 (e) monomer insertions after end-group modification through aminolysis and a *in situ* thiolene coupling with dodecyl acrylate and subsequent deprotection with TFA. Complete Boc removal is confirmed by the absence of a singlet at 1.45 ppm indicative of the tert-butyl protons of Boc protection groups. All NMRs are measured in  $\text{CD}_3\text{OD}$ . The peaks at 1.18 and 3.6 ppm, in spectrum a, and at 5.49 ppm in spectrum c and d are residual peaks of diethyl ether and DCM respectively.

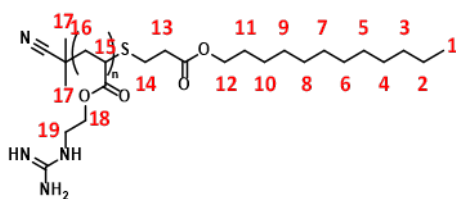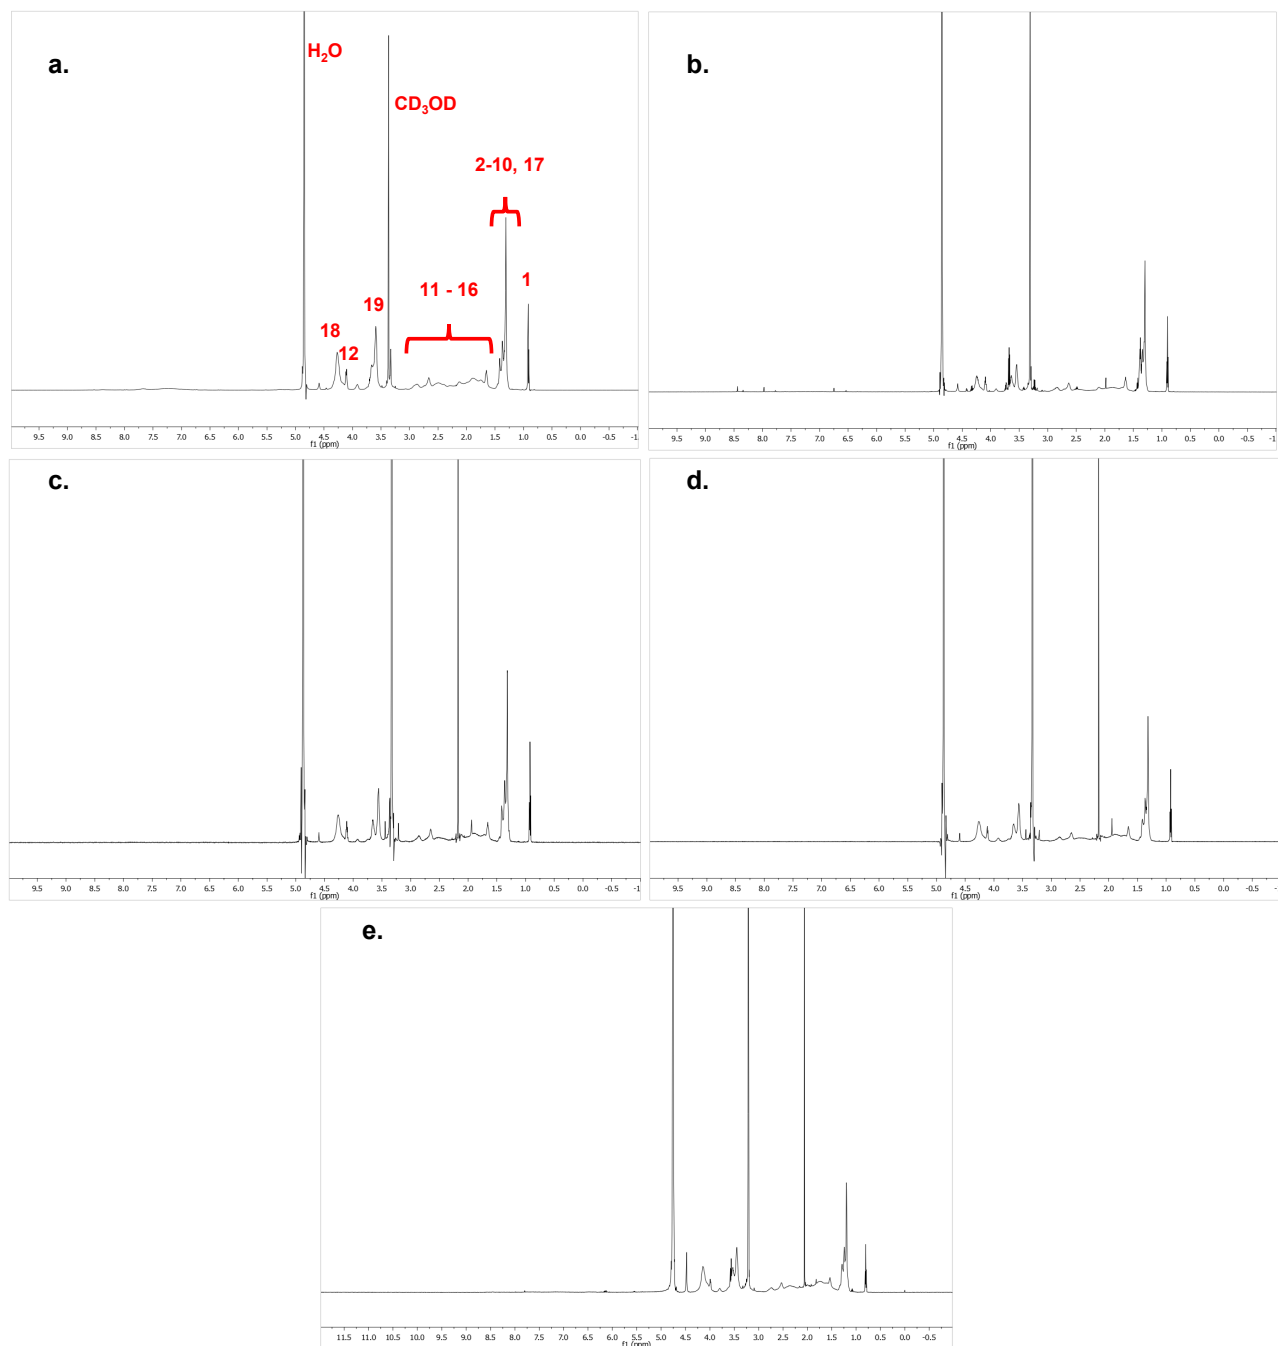

**Figure S5:**  $^1\text{H}$  NMR of disperse (**a**) and discrete oligomers with 5 (**b**), 6 (**c**), 7 (**d**) or 8 (**e**) monomer insertions after guanylation. Conversion of primary amines to guanidines is confirmed by a shift in the proton signals adjacent to the functional groups (**19**) from from  $\sim 3.30$  ppm (adjacent to amine) to  $3.54$  ppm (adjacent to guanidine). All NMRs are measured in  $\text{CD}_3\text{OD}$ . The peak at  $2.16$  ppm in spectrum **c** and **d** is a residual peak of acetone.

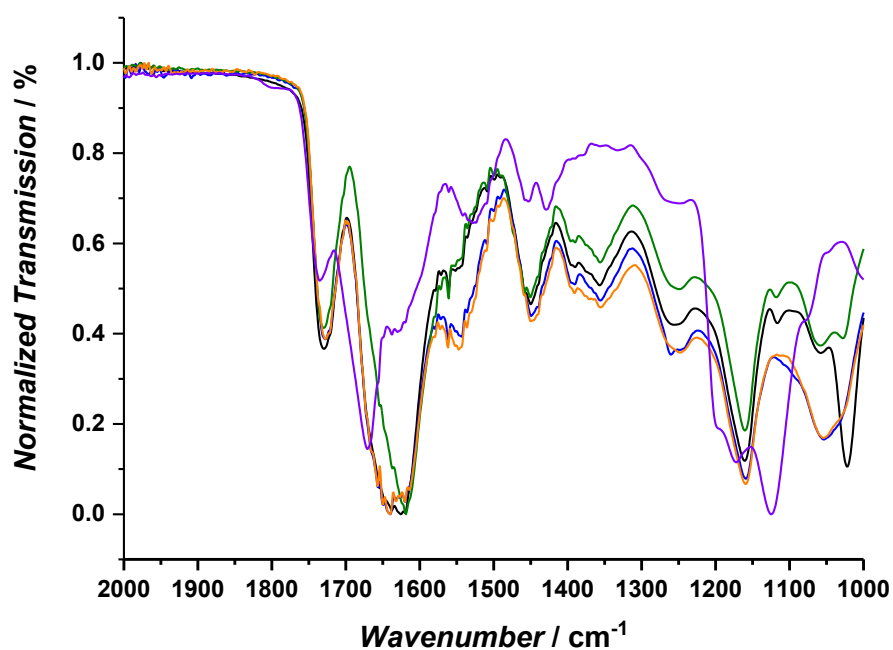

**Figure S6:** ATR FT-IR spectra of primary amine oligomer (purple) and of guanidine modified oligomers (black – orange). After guanylation, a new peak appears around 1639  $\text{cm}^{-1}$  which is indicative of C=N stretching. In addition, no evidence of base induced isomerization of the oligomers is present with the FT-IR spectrum retaining a C=O stretch signal at 1718  $\text{cm}^{-1}$  and C-O stretch at 1146  $\text{cm}^{-1}$ , both indicating the presence of esters.
